# Supplementary figures and images for: Quantification of Extramyocellular Lipids and Intramuscular Fat from Muscle Echo Intensity in Lower Limb Muscles: A Comparison of Four Ultrasound Devices against Magnetic Resonance Spectroscopy
Source: MDPI journal article supplement (doi:10.3390/s23115282), 2023-06-02

# RAW EI

# YOUNG EI

IMF

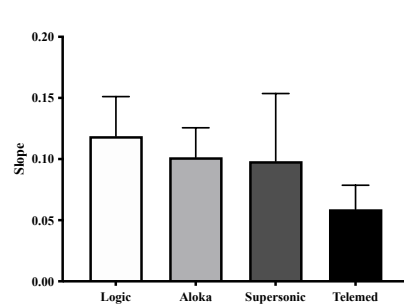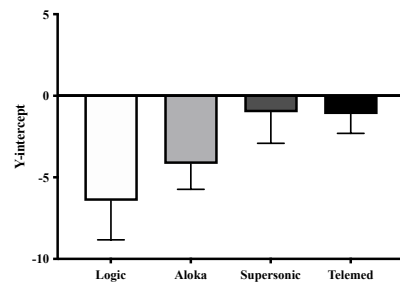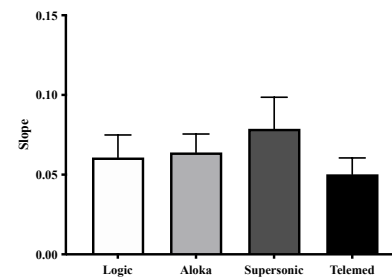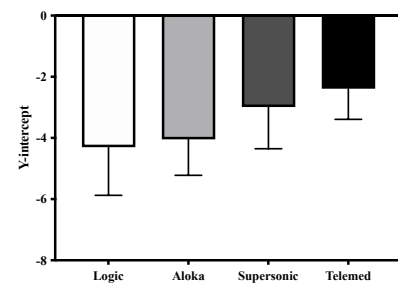

IMCL

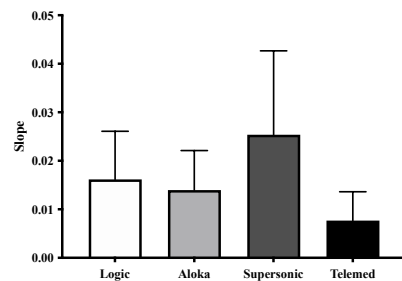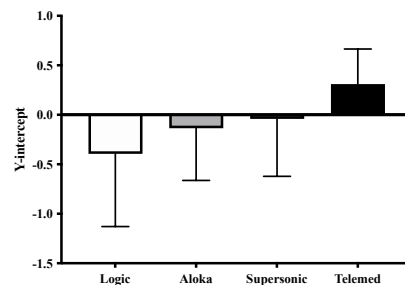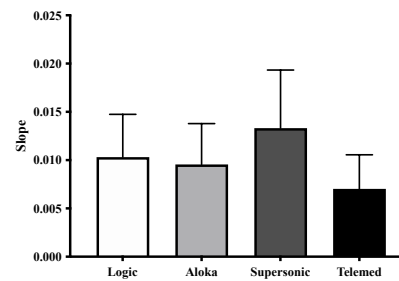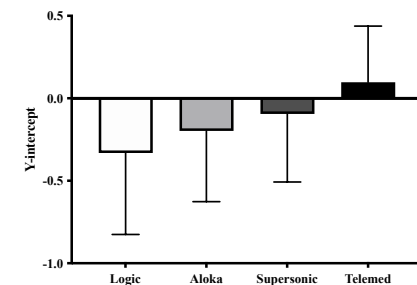

EMCL

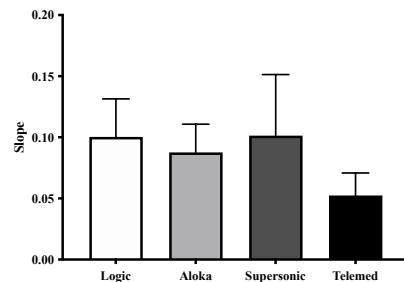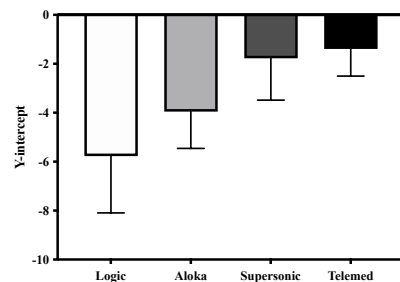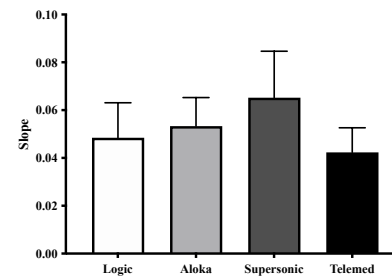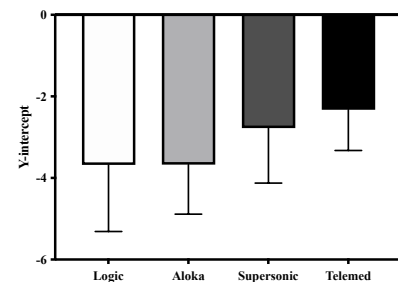

Supplement: s1 [file s1]
